# Supplementary material for: Self-powered electrocatalytic ammonia synthesis directly from air as driven by dual triboelectric nanogenerators
Source: Royal Society of Chemistry journal article supplement (doi:10.1039/d0ee01102a), 2020-01-01
Supplement: d0ee01102a1.pdf [file d0ee01102a1.pdf]

## Electronic Supplementary Information

### Self-Powered Electrocatalytic Ammonia Synthesis Directly from Air as Driven by Dual Triboelectric Nanogenerators

Kai Han,<sup>ab</sup> Jianjun Luo,<sup>ab</sup> Yawei Feng,<sup>ab</sup> Liang Xu,<sup>ab</sup> Wei Tang<sup>\*abc</sup> and Zhong Lin Wang<sup>\*abd</sup>

<sup>a</sup>CAS Center for Excellence in Nanoscience, Beijing Institute of Nanoenergy and Nanosystems, Chinese Academy of Sciences, Beijing 100083, P. R. China

Email: tangwei@binn.cas.cn

<sup>b</sup>School of Nanoscience and Technology, University of Chinese Academy of Sciences, Beijing 100049, P. R. China

<sup>c</sup>Center on Nanoenergy Research, School of Physical Science and Technology, Guangxi University, Nanning 530004, P.R. China

<sup>d</sup>School of Material Science and Engineering, Georgia Institute of Technology, Atlanta, Georgia 30332-0245, USA.

Email: [zlwang@gatech.edu](mailto:zlwang@gatech.edu)

Table. S1 State of the art in electrocatalytic ammonia synthesis and our self-powered synthetic method.

| Ref. | Anode          | Cathode                                                                                            | T                  | P | Raw materials                     | Electrolyte                           | NH <sub>3</sub> yeild (μg h <sup>-1</sup> )                                                  | Power           |
|------|----------------|----------------------------------------------------------------------------------------------------|--------------------|---|-----------------------------------|---------------------------------------|----------------------------------------------------------------------------------------------|-----------------|
| 1    | Pt sheet       | Nanoporous Pd on a glassy carbon disk electrode (0.29 mg cm <sup>-2</sup> , 0.28 cm <sup>2</sup> ) | Ambient conditions |   | N <sub>2</sub> , H <sub>2</sub> O | 0.1 M PBS                             | 1.66 (5.92 μg h <sup>-1</sup> cm <sup>-2</sup> ) (20.4 μg h <sup>-1</sup> mg <sup>-1</sup> ) | -0.15 V vs. RHE |
| 2    | Graphite plate | Au nanorods on a carbon paper (1 cm <sup>2</sup> )                                                 | Ambient conditions |   | N <sub>2</sub> , H <sub>2</sub> O | 0.1 M KOH                             | 1.648 (1.648 μg h <sup>-1</sup> cm <sup>-2</sup> )                                           | -0.2 V vs. RHE  |
| 3    | Pt mesh        | Au <sub>6</sub> /Ni on a carbon cloth (2.0 mg cm <sup>-2</sup> , 1 cm <sup>2</sup> )               | Ambient conditions |   | N <sub>2</sub> , H <sub>2</sub> O | 0.05 M H <sub>2</sub> SO <sub>4</sub> | 14.8 (14.8 μg h <sup>-1</sup> cm <sup>-2</sup> ) (7.4 μg h <sup>-1</sup> mg <sup>-1</sup> )  | -0.14 V vs. RHE |
| 4    | Pt foil        | Au sub-nanoclusters/Ti O <sub>2</sub> on a carbon paper (1 mg, 1 cm <sup>2</sup> )                 | Ambient conditions |   | N <sub>2</sub> , H <sub>2</sub> O | 0.1 M HCl                             | 21.4 (21.4 μg h <sup>-1</sup> cm <sup>-2</sup> ) (21.4 μg h <sup>-1</sup> mg <sup>-1</sup> ) | -0.2 V vs. RHE  |
| 5    | Pt foil        | Fe-N-C on a carbon paper (1 mg cm <sup>-2</sup> , 1 cm <sup>2</sup> )                              | Ambient conditions |   | N <sub>2</sub> , H <sub>2</sub> O | 0.1 M KOH                             | 7.48 (7.48 μg h <sup>-1</sup> cm <sup>-2</sup> ) (7.48 μg h <sup>-1</sup> mg <sup>-1</sup> ) | 0 V vs. RHE     |
| 6    | Graphite rod   | Cu/PI-300 on a carbon cloth (1 cm <sup>2</sup> )                                                   | Ambient conditions |   | N <sub>2</sub> , H <sub>2</sub> O | 0.1 M KOH                             | 17.2 (17.2 μg h <sup>-1</sup> cm <sup>-2</sup> )                                             | -0.4 V vs. RHE  |
| 7    | Pt foil        | Plasma R-O-Bi on a carbon paper                                                                    | Ambient conditions |   | N <sub>2</sub> , H <sub>2</sub> O | 0.2 M Na <sub>2</sub> SO <sub>4</sub> | 2.4 (2.400 μg h <sup>-1</sup> cm <sup>-2</sup> )                                             | -0.9 V vs. RHE  |

|      |                                                                                          |                                                                                                                   |                    |     |                                   |                                                                                                    |                                                                                                                    |                 |
|------|------------------------------------------------------------------------------------------|-------------------------------------------------------------------------------------------------------------------|--------------------|-----|-----------------------------------|----------------------------------------------------------------------------------------------------|--------------------------------------------------------------------------------------------------------------------|-----------------|
|      |                                                                                          | (0.5 mg cm <sup>-2</sup> , 1 cm <sup>2</sup> )                                                                    |                    |     |                                   |                                                                                                    | (5.453 μg h <sup>-1</sup> mg <sub>Bi</sub> <sup>-1</sup> )                                                         |                 |
| 8    | Graphite rod                                                                             | Fe-doped TiO <sub>2</sub> on a carbon paper (0.1 mg, 1 cm <sup>2</sup> )                                          | Ambient conditions |     | N <sub>2</sub> , H <sub>2</sub> O | 0.5 M LiClO <sub>4</sub>                                                                           | 2.547 (2.547 μg h <sup>-1</sup> cm <sup>-2</sup> ) (25.47 μg h <sup>-1</sup> mg <sup>-1</sup> )                    | -0.40 V vs. RHE |
| 9    | Pt foil                                                                                  | C-doped TiO <sub>2</sub> on a carbon paper (0.60 mg cm <sup>-2</sup> , 1 cm <sup>2</sup> )                        | Ambient conditions |     | N <sub>2</sub> , H <sub>2</sub> O | 0.1 M LiClO <sub>4</sub>                                                                           | 8.88 (8.88 μg h <sup>-1</sup> cm <sup>-2</sup> ) (14.8 μg h <sup>-1</sup> mg <sup>-1</sup> )                       | -0.4 V vs. RHE  |
| 10   | Pt wire                                                                                  | WO <sub>3-x</sub> (Vo) <sub>2</sub> on a carbon fiber paper (1.2 mg, 1 x 1.2 cm <sup>2</sup> )                    | Ambient conditions |     | N <sub>2</sub> , H <sub>2</sub> O | PH=1, HCl                                                                                          | 5.04 (4.2 μg h <sup>-1</sup> cm <sup>-2</sup> ) (4.2 μg h <sup>-1</sup> mg <sup>-1</sup> )                         | -0.12 V vs. RHE |
| 11   | Graphite rod                                                                             | PC/Sb/SbPO <sub>4</sub> on a carbon paper (0.2 mg cm <sup>-2</sup> , 1 cm <sup>2</sup> )                          | Ambient conditions |     | N <sub>2</sub> , H <sub>2</sub> O | 0.1 M HCl                                                                                          | 5 (5 μg h <sup>-1</sup> cm <sup>-2</sup> ) (25 μg h <sup>-1</sup> mg <sup>-1</sup> )                               | -0.25 V vs. RHE |
| 12   | Graphite rod                                                                             | Defect-rich MoS <sub>2</sub> on a carbon paper (0.1 mg, 0.5 x 0.5 cm <sup>2</sup> )                               | Ambient conditions |     | N <sub>2</sub> , H <sub>2</sub> O | 0.1 M Na <sub>2</sub> SO <sub>4</sub>                                                              | 2.928 (11.712 μg h <sup>-1</sup> cm <sup>-2</sup> ) (29.28 μg h <sup>-1</sup> mg <sup>-1</sup> )                   | -0.4 V vs. RHE  |
| 13   | Pt plate                                                                                 | Few-layer black Phosphorus nanosheets on a carbon fiber substrate (about 0.2 mg)                                  | Ambient conditions |     | N <sub>2</sub> , H <sub>2</sub> O | 0.01 M HCl                                                                                         | 6.274 (31.37 μg h <sup>-1</sup> mg <sup>-1</sup> )                                                                 | -0.7 V vs. RHE  |
| 14   | Pt foil                                                                                  | Eex-COF on a nitrogen-doped carbon nanosheet (1 mg, 1 cm <sup>2</sup> )                                           | Ambient conditions |     | N <sub>2</sub> , H <sub>2</sub> O | 0.1M KOH                                                                                           | 12.53 (12.53 μg h <sup>-1</sup> cm <sup>-2</sup> ) (12.53 μg h <sup>-1</sup> mg <sup>-1</sup> )                    | -0.2 V vs. RHE  |
| 15   | Pt wire                                                                                  | MOF(Fe) on a carbon paper (1 x 3 cm <sup>2</sup> )                                                                | 90 °C              | AP  | Air, H <sub>2</sub> O             | 2 M KOH                                                                                            | 279.1 (93.02 μg h <sup>-1</sup> cm <sup>-2</sup> ) (1.52 x 10 <sup>-9</sup> mol s <sup>-1</sup> cm <sup>-2</sup> ) | 1.2 V           |
| 16   | Pr <sub>0.6</sub> Ba <sub>0.4</sub> Fe <sub>0.8</sub> Cu <sub>0.2</sub> O <sub>3-δ</sub> | Pr <sub>0.6</sub> Ba <sub>0.4</sub> Fe <sub>0.8</sub> Cu <sub>0.2</sub> O <sub>3-δ</sub> (1.281 cm <sup>2</sup> ) | 400 °C             | AP  | Wet air (3 mol% H <sub>2</sub> O) | Ce <sub>0.8</sub> Gd <sub>0.2</sub> O <sub>2-δ</sub> (CGO)- (Li,Na,K) <sub>2</sub> CO <sub>3</sub> | 8.4 (6.56 μg h <sup>-1</sup> cm <sup>-2</sup> ) (1.07 x 10 <sup>-6</sup> mol s <sup>-1</sup> m <sup>-2</sup> )     | 1.4 V           |
| 17   | La <sub>0.8</sub> Cs <sub>0.2</sub> Fe <sub>0.8</sub> Ni <sub>0.2</sub> O <sub>3-δ</sub> | La <sub>0.8</sub> Cs <sub>0.2</sub> Fe <sub>0.8</sub> Ni <sub>0.2</sub> O <sub>3-δ</sub> (1.281 cm <sup>2</sup> ) | 600 °C             | AP  | Wet air (3 mol% H <sub>2</sub> O) | Ce <sub>0.8</sub> Gd <sub>0.2</sub> O <sub>2-δ</sub> (CGO)- (Li,Na,K) <sub>2</sub> CO <sub>3</sub> | 7.22 (5.64 μg h <sup>-1</sup> cm <sup>-2</sup> ) (9.21 x 10 <sup>-7</sup> mol s <sup>-1</sup> m <sup>-2</sup> )    | 1.4 V           |
| 18   | 30 wt% Pt/C on a gas diffusion layer                                                     | 30 wt% Pt/C on a gas diffusion layer (1 mg cm <sup>-2</sup> , 1 cm <sup>2</sup> )                                 | RT                 | AP  | Air, H <sub>2</sub> O             | solid electrolyte                                                                                  | 69.77 (69.77 μg h <sup>-1</sup> cm <sup>-2</sup> ) (1.14 x 10 <sup>-5</sup> mol m <sup>-2</sup> s <sup>-1</sup> )  | -1.6 V          |
| 19   | 30 wt% Pt/C on a carbon paper                                                            | 30 wt% Pt/C on a carbon paper (1 cm <sup>2</sup> )                                                                | 80 °C              | amb | Air, H <sub>2</sub> O             | 0.1 M Li <sub>2</sub> SO <sub>4</sub>                                                              | 57.34 (57.34 μg h <sup>-1</sup> cm <sup>-2</sup> ) (9.37 x 10 <sup>-6</sup> mol m <sup>-2</sup> s <sup>-1</sup> )  | 1.2 V           |
| This | Graphite                                                                                 | TiO <sub>2</sub> /carbon                                                                                          | Ambient            |     | NO <sub>3</sub> <sup>-</sup>      | 100 mg                                                                                             | 1.9                                                                                                                | -3 V            |

|      |                |                                                                                        |            |                                                 |                                                                     |      |                                                      |
|------|----------------|----------------------------------------------------------------------------------------|------------|-------------------------------------------------|---------------------------------------------------------------------|------|------------------------------------------------------|
| work | plate          | cloth<br>(1 mg cm <sup>-2</sup> , 1 cm <sup>2</sup> )                                  | conditions | H <sub>2</sub> O                                | L <sup>-1</sup> NO <sub>3</sub> <sup>-</sup>                        |      |                                                      |
|      | Graphite plate | TiO <sub>2</sub> /carbon cloth<br>(1 mg cm <sup>-2</sup> , 1 cm <sup>2</sup> )         |            | NO <sub>3</sub> <sup>-</sup> , H <sub>2</sub> O | 100 mg L <sup>-1</sup> NO <sub>3</sub> <sup>-</sup>                 | 5.7  | TENG (5000 r min <sup>-1</sup> )                     |
|      | Graphite plate | TiO <sub>2</sub> /carbon cloth<br>(1 mg cm <sup>-2</sup> , 1 cm <sup>2</sup> )         |            | NO <sub>3</sub> <sup>-</sup> , H <sub>2</sub> O | 100 mg L <sup>-1</sup> NO <sub>3</sub> <sup>-</sup>                 | 20.8 | TENG with transformer (5000 r min <sup>-1</sup> )    |
|      | Graphite plate | TiO <sub>2</sub> /carbon cloth<br>(1 mg cm <sup>-2</sup> , 2.5 x 2.5 cm <sup>2</sup> ) |            | Air, H <sub>2</sub> O                           | mixed NO <sub>3</sub> <sup>-</sup> and NO <sub>2</sub> <sup>-</sup> | 2.4  | Self-powered (3.5 m <sup>3</sup> min <sup>-1</sup> ) |

Note: T, temperature. P, pressure. RT, room temperature. AP, atmospheric pressure. RHE, reversible hydrogen electrode. PBS, phosphate buffer solution. Eex-COF, Electrochemically excited covalent organic frameworks. PC, phosphorus-doped carbon.

## References

- W. Xu, G. Fan, J. Chen, J. Li, L. Zhang, S. Zhu, X. Su, F. Cheng, J. Chen, *Angew. Chem. Int. Ed.*, 2020, **59**, 3511-3516.
- D. Bao, Q. Zhang, F.-L. Meng, H.-X. Zhong, M.-M. Shi, Y. Zhang, J.-M. Yan, Q. Jiang, X.-B. Zhang, *Adv. Mater.*, 2017, **29**, 1604799.
- Z.-H. Xue, S.-N. Zhang, Y.-X. Lin, H. Su, G.-Y. Zhai, J.-Tan Han, Q.-Y. Yu, X.-H. Li, M. Antonietti, J.-S. Chen, *J. Am. Chem. Soc.*, 2019, **141**, 14976-14980.
- M.-M. Shi, D. Bao, B.-R. Wulan, Y.-H. Li, Y.-F. Zhang, J.-M. Yan, Q. Jiang, *Adv. Mater.*, 2017, **29**, 1606550.
- M. Wang, S. Liu, T. Qian, J. Liu, J. Zhou, H. Ji, J. Xiong, J. Zhong, C. Yan, *Nat. Commun.*, 2019, **10**, 341.
- Y.-X. Lin, S.-N. Zhang, Z.-H. Xue, J.-J. Zhang, H. Su, T.-J. Zhao, G.-Y. Zhai, X.-H. Li, M. Antonietti, J.-S. Chen, *Nat. Commun.*, 2019, **10**, 4380.
- Y. Wang, M. Shi, D. Bao, F. Meng, Q. Zhang, Y. Zhou, K. Liu, Y. Zhang, J. Wang, Z. Chen, D. Liu, Z. Jiang, M. Luo, L. Gu, Q. Zhang, X. Cao, Y. Yao, M. Shao, Y. Zhang, X.-B. Zhang, J. G. Chen, J. Yan, Q. Jiang, *Angew. Chem. Int. Ed.*, 2019, **58**, 9464-9469.
- T. Wu, Z. Xing, S. Mou, C. Li, Y. Qiao, Q. Liu, X. Zhu, Y. Luo, X. Shi, Y. Zhang, X. Sun, *Angew. Chem. Int. Ed.*, 2019, **58**, 18449-18453.
- Q. Qin, Y. Zhao, M. Schmallegger, T. Heil, J. Schmidt, R. Walczak, G. Gescheidt-Demner, H. Jiao, M. Oschatz, *Angew. Chem. Int. Ed.*, 2019, **58**, 13101-13106.
- Z. Sun, R. Huo, C. Choi, S. Hong, T.-S. Wu, J. Qiu, C. Yan, Z. Han, Y. Liu, Y.-L. Soo, Y. Jung, *Nano Energy*, 2019, **62**, 869-875.
- X. Liu, H. Jang, P. Li, J. Wang, Q. Qin, M. G. Kim, G. Li, J. Cho, *Angew. Chem. Int. Ed.*, 2019, **58**, 13329-13334.
- X. Li, T. Li, Y. Ma, Q. Wei, W. Qiu, H. Guo, X. Shi, P. Zhang, A. M. Asiri, L. Chen, B. Tang, X. Sun, *Adv. Energy Mater.*, 2018, **8**, 1801357.
- L. Zhang, L.-X. Ding, G.-F. Chen, X. Yang, H. Wang, *Angew. Chem. Int. Ed.*, 2019, **58**, 2612-2616.
- S. Liu, M. Wang, T. Qian, H. Ji, J. Liu, C. Yan, *Nat. Commun.*, 2019, **10**, 3898.
- X. Zhao, F. Yin, N. Liu, G. Li, T. Fan, B. Chen, *J. Mater. Sci.*, 2017, **52**, 10175-10185.
- R. Lan, K. A. Alkhazmi, I. A. Amar, S. Tao, *Appl. Catal., B*, 2014, **152-153**, 212-217.
- R. Lan, K. A. Alkhazmi, I. A. Amar, S. Tao, *Electrochim. Acta*, 2014, **123**, 582-587.
- R. Lan, J. T. S. Irvine, S. Tao, *Sci. Rep.*, 2013, **3**, 1145.
- R. Lan, S. Tao, *RSC Adv.*, 2013, **3**, 18016-18021.

## Chemical Reagents

Hydrochloric acid (Beijing Chemical Works, HCl, 36.0-38.0%), ammonium sulfamate (Aladdin, H<sub>6</sub>N<sub>2</sub>O<sub>3</sub>S, AR, 99.0%), sulfanilamide (Aladdin, C<sub>6</sub>H<sub>8</sub>N<sub>2</sub>O<sub>2</sub>S, standard for GC, >99.8%), N-(1-naphthyl) ethylenediamine dihydrochloride (Aladdin, C<sub>12</sub>H<sub>14</sub>N<sub>2</sub>·2HCl, ACS, >98%), potassium nitrate (Aladdin, KNO<sub>3</sub>, 99.99% metals basis), potassium nitrite (Aladdin, KNO<sub>2</sub>, AR, 97%), sodium hydroxide (Beijing Chemical Works, NaOH, AR, 99%), salicylic acid (Aladdin, C<sub>7</sub>H<sub>6</sub>O<sub>3</sub>, AR, 99.5%), sodium citrate dihydrate (MACKULIN, Na<sub>3</sub>C<sub>6</sub>H<sub>5</sub>O<sub>7</sub>·2H<sub>2</sub>O, AR, 99.0%), ammonium nitrate-15N (Aladdin, NH<sub>4</sub><sup>15</sup>NO<sub>3</sub>, 99atom%,

$\geq 98.5\%$ ), sodium hypochlorite solution (Aladdin, NaClO, available chlorine,  $\geq 5.0\%$ ), sodium nitroferricyanide dihydrate (Aladdin,  $C_5FeN_6Na_2O \cdot 2H_2O$ , 99.98% metals basis).

#### Determination of $NO_3^-$

A 5 mL of original or diluted solution is removed as the test sample. A 100  $\mu$ L of 1 M HCl solution and a 400  $\mu$ L of 5 wt%  $H_6N_2O_3S$  aqueous solution are added into the sample in order, followed by 4.5 ml pure water. The mixed solution is measured by an ultraviolet-visible spectrophotometer (UV-3600, SHIMADZU Ltd.). The characteristic absorption of  $NO_3^-$  is at the wavelength of 210 nm. In addition, the absorbance at 275 nm is used to eliminate the potential interference. The absorbance calculation formula is as follows.

$$A_{NO_3^-} = A_{210} - 2 * A_{275}$$

#### Determination of $NO_2^-$

A 5 mL of original or diluted solution is removed as the test sample. A 100  $\mu$ L of 10 g  $L^{-1}$  sulfanilamide solution containing 10% concentrated HCl solution is added into the sample. After 5 minutes, a 100  $\mu$ L of 1 g  $L^{-1}$   $C_{12}H_{14}N_2 \cdot 2HCl$  is also added into to the sample. After 15 minutes, the mixed solution is measured. The characteristic absorption of  $NO_2^-$  is at the wavelength of 543 nm.

#### Determination of $NH_3$

$NH_3$  is determined by the indophenol blue method. A 2 mL of original or diluted solution is removed as the test sample. Then, a 2 mL of mixed solution containing 1 M NaOH, 5 wt%  $C_7H_6O_3$  and 5 wt%  $Na_3C_6H_5O_7$  is added into the sample, followed by a 1 mL of 0.05 mol  $L^{-1}$  NaClO and a 0.2 mL of 1 wt%  $C_5FeN_6Na_2O$  solution. After 2 h, the solution is measured. The characteristic absorption of  $NH_3$  is at the wavelength of 655 nm.

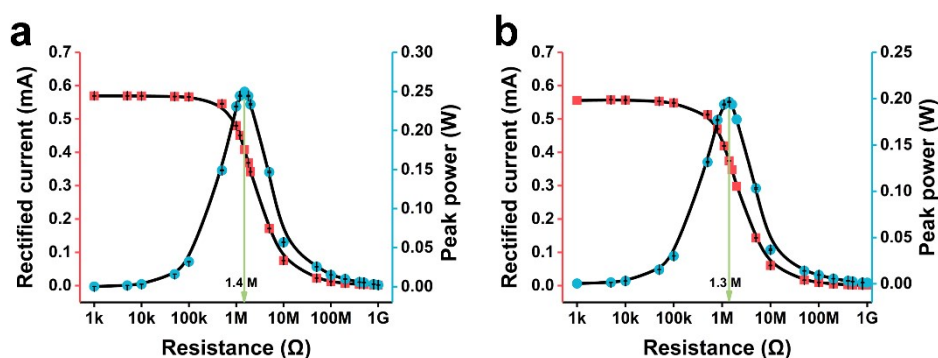

Fig. S1 Rectified current and peak power of (a) TENG-1 and (b) TENG-2.

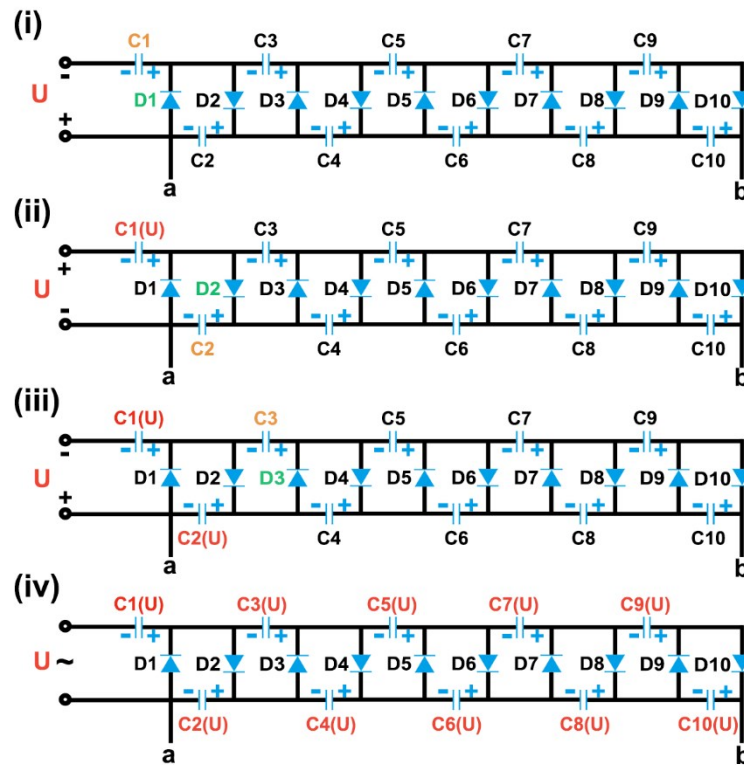

**Fig. S2** Schematic diagram of the basic working principle of ten-stage voltage multiplier circuit.

**Description of the principle**

Since the output signal of TENG is alternating, diode D1 will be on and D2 will be off when the signal is in one half cycle as shown in the process (i). Meanwhile, capacitor C1 will be charged and the maximum voltage of C1 can reach to the same value U of TENG. In the process (ii), the output signal is in another half cycle, D2 will be on and D1 will be off. Similarly, Capacitor C2 can be charged with the maximum voltage value U. Then C3 and other capacitors will be charged gradually until all of them reach the maximum condition, as shown in process (iii) and (iv). Since each capacitor has the same voltage polarity, the voltage in the circuit is the sum of the voltages of ten capacitors. The voltage at end a is negative and end b is positive.

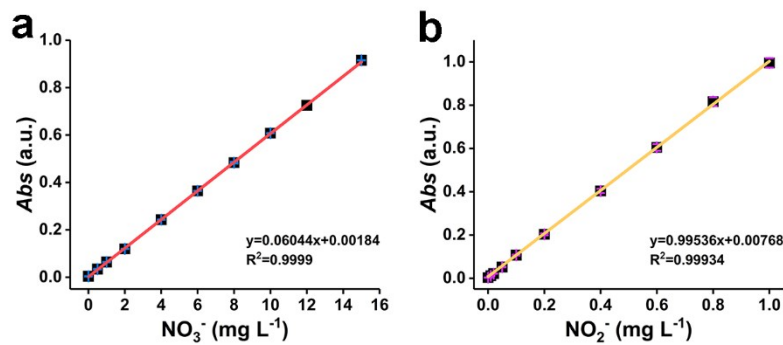

**Fig. S3** Standard calibration curve of different concentrations of (a)  $\text{NO}_3^-$  and (b)  $\text{NO}_2^-$ .

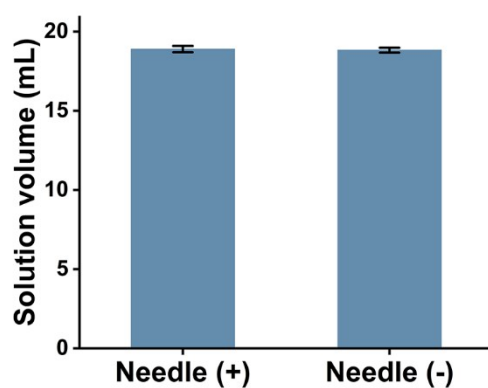

**Fig. S4** Residual solution volume in the gas-washing bottle after 6 h air discharge when using needle as the positive or the negative electrode.

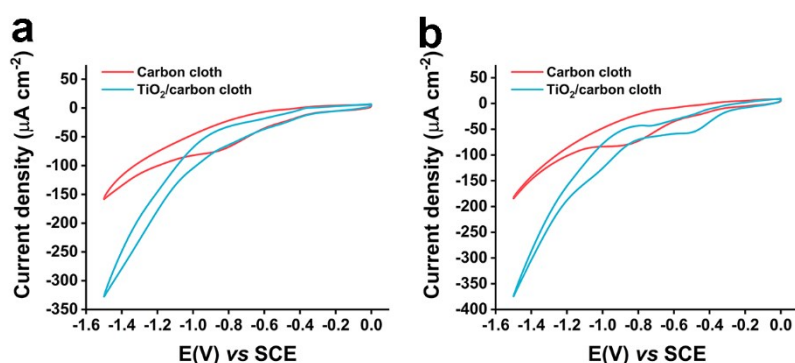

**Fig. S5** CV curves in (a)  $100 \text{ mg L}^{-1} \text{ NO}_3^-$  solution and (b)  $100 \text{ mg L}^{-1} \text{ NO}_2^-$  solution.

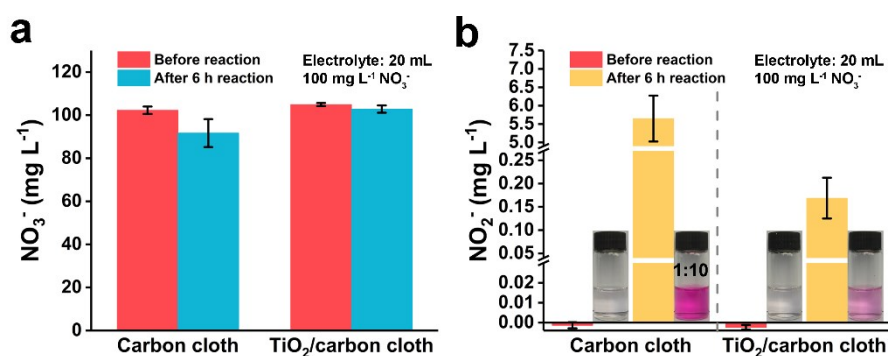

**Fig. S6** Concentration variations of (a)  $\text{NO}_3^-$  and (b)  $\text{NO}_2^-$  using  $100 \text{ mg L}^{-1} \text{ NO}_3^-$  as electrolyte in a single cell with a DC power ( $-3 \text{ V}$ ) drive.

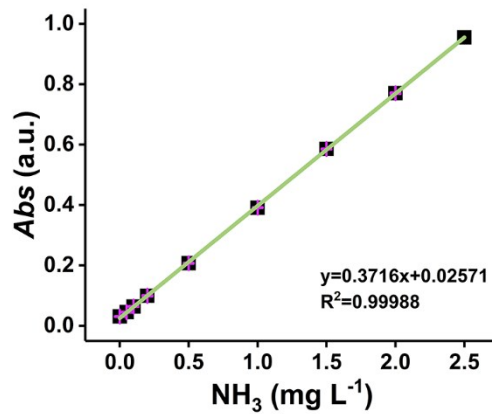

Fig. S7 Standard calibration curve of different concentrations of  $\text{NH}_3$ .

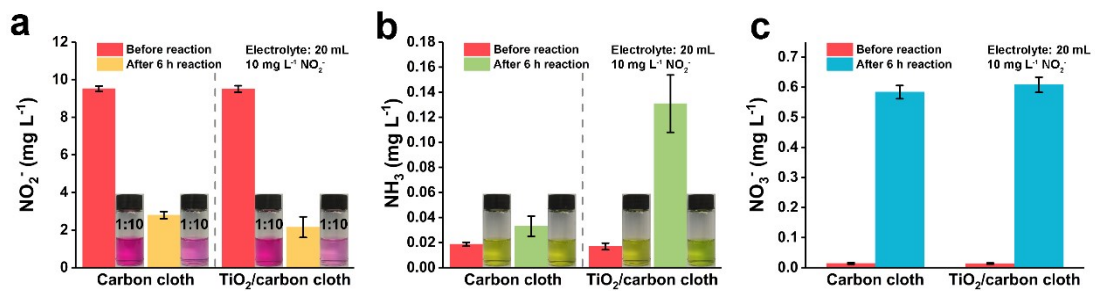

Fig. S8 Concentration variations of (a)  $\text{NO}_2^-$ , (b)  $\text{NH}_3$  and (c)  $\text{NO}_3^-$  using  $10 \text{ mg L}^{-1} \text{NO}_2^-$  as electrolyte in a single cell with a DC power ( $-3 \text{ V}$ ) drive.

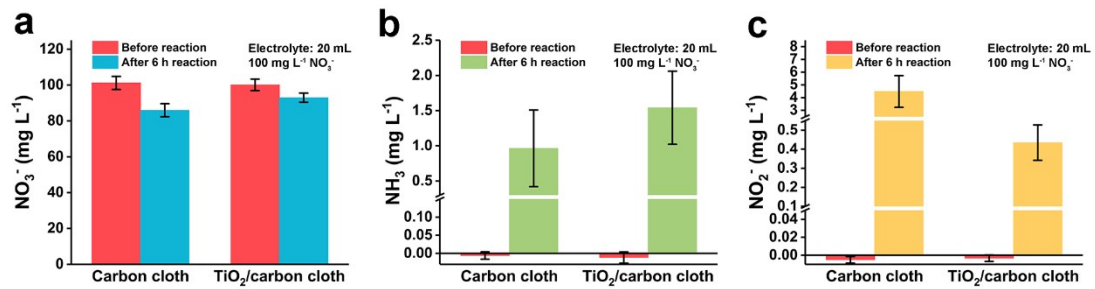

Fig. S9 Concentration variations of (a)  $\text{NO}_3^-$ , (b)  $\text{NH}_3$  and (c)  $\text{NO}_2^-$  using  $100 \text{ mg L}^{-1} \text{NO}_3^-$  as electrolyte in a constant current condition with  $-0.25 \text{ mA}$  by an electrochemical station.

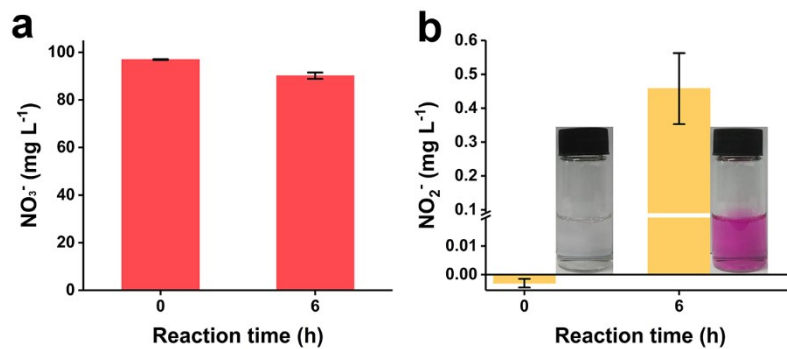

Fig. S10 Concentration variations of (a)  $\text{NO}_3^-$ , (b)  $\text{NO}_2^-$  using  $100 \text{ mg L}^{-1} \text{NO}_3^-$  as electrolyte in a single cell with rectified TENG-2 drive.

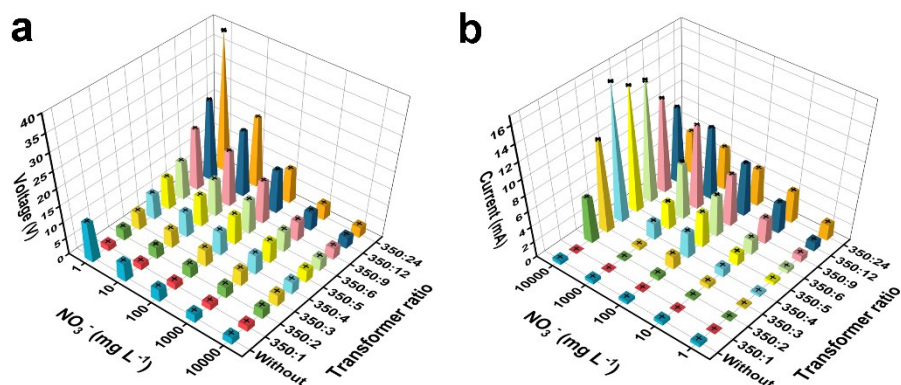

**Fig. S11** (a) Voltage variation and (b) current variation of the single cell using different concentrations of  $\text{NO}_3^-$  with voltage regulating and rectified TENG-2 drive.

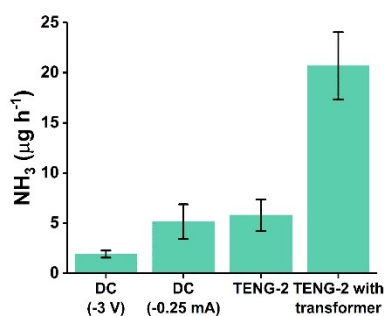

**Fig. S12** Comparison of  $\text{NH}_3$  in mass yield per hour by DC (-3 V), DC (-0.25 mA), TENG-2 and TENG-2 with transformer.

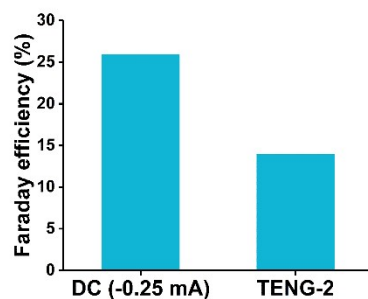

**Fig. S13** Comparison of Faraday efficiency by DC (-0.25 mA) and TENG-2.

**Calculation process**

$$\text{Faraday efficiency (\%)} = \frac{mn_t t F}{\int_0^t i dt} \times 100\%$$

$m$  is the number of electrons of reducing  $\text{NO}_3^-$  into  $\text{NH}_3$ ,  $n_t$  is the average mole yield per unit time of  $\text{NH}_3$ ,  $t$  is the reaction time,  $F$  is Faraday constant,  $i$  is the current.

Since the output of TENG after rectification is pulsed signal, the current data are integrated.



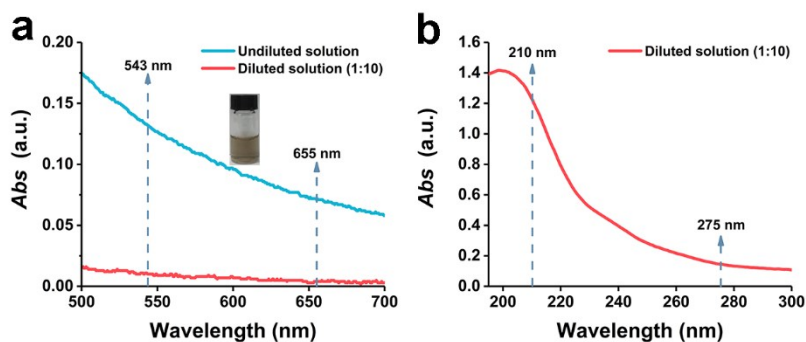

**Fig. S14** Absorption curves in (a) ultraviolet and (b) visible region of electrolyte solution after 6 h reaction with or without dilution in a single cell driven by voltage step-down (350:12) and rectified TENG-2.

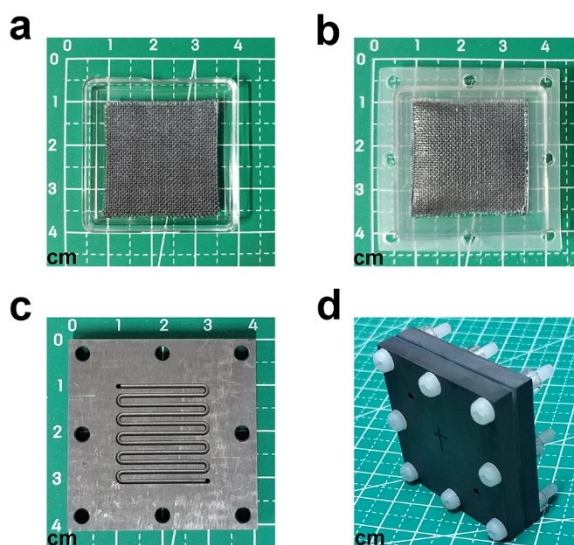

**Fig. S15** Pictures of (a) a piece of TiO<sub>2</sub>/carbon cloth, (b) an assembly of nafion membrane (NRE-211) and TiO<sub>2</sub>/carbon cloth with silicone seal, (c) a graphite electrode and (d) a dual-compartment electrocatalytic cell.

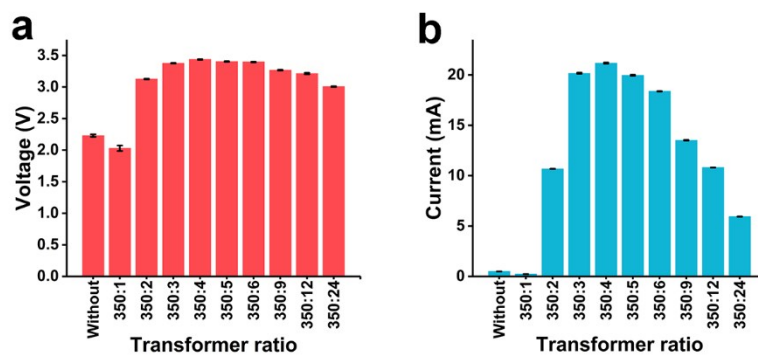

**Fig. S16** (a) Voltage variation and (b) current variation of the dual-compartment electrocatalytic cell using 100 mg L<sup>-1</sup> NO<sub>3</sub><sup>-</sup> as electrolyte with voltage regulating and rectified TENG-2 drive.

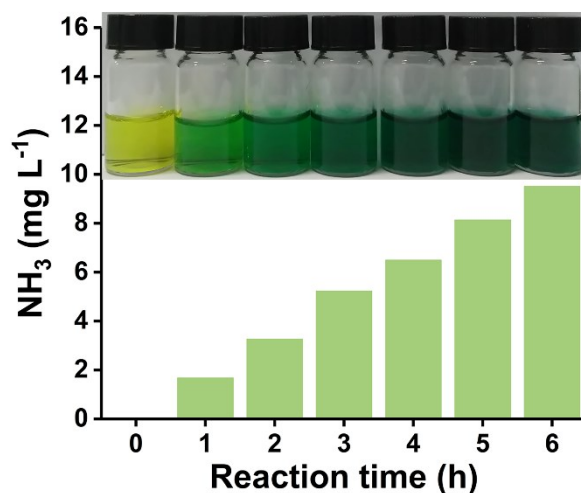

**Fig. S17** Concentration variation of NH<sub>3</sub> from 1 to 6 h in the cathode with voltage step-down (350:4) and rectified TENG-2 drive.

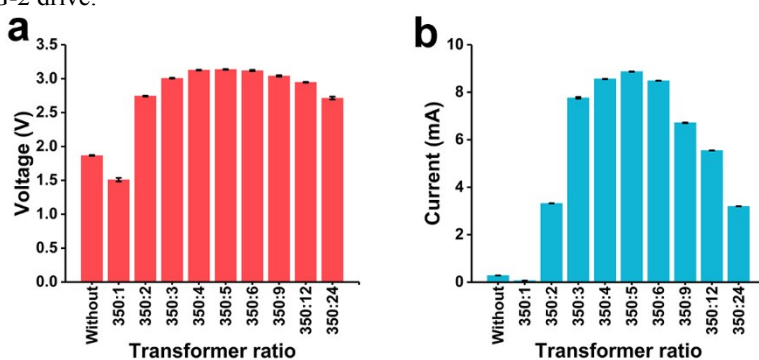

**Fig. S18** (a) Voltage variation and (b) current variation of the dual-compartment electrocatalytic cell using electrolyte from air discharge with voltage regulating and rectified TENG-2 drive at a gas flow rate of 3.5 m<sup>3</sup> min<sup>-1</sup>.

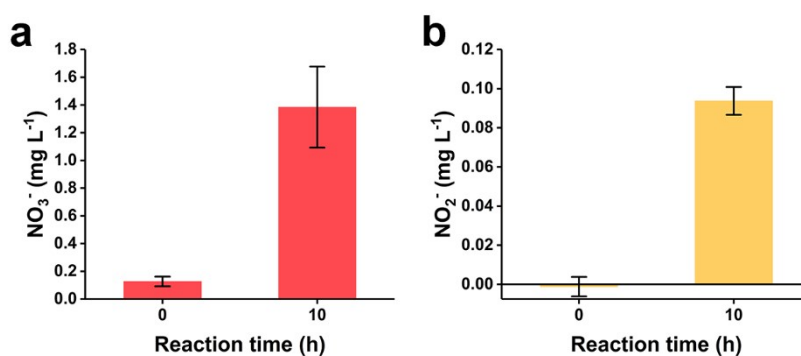

**Fig. S19** (a) Concentration of NO<sub>3</sub><sup>-</sup> in the cathode compartment by self-powered synthesis for 10 h. (b) Concentration of NO<sub>2</sub><sup>-</sup> in the cathode compartment by self-powered synthesis for 10 h.
